# Supplementary material for: Formation of tungsten trioxide with hierarchical architectures arranged by tiny nanorods for lithium ion batteries
Source: Royal Society of Chemistry journal article supplement (doi:10.1039/c5ra26645a), 2016-01-01
Supplement: c5ra26645a1.pdf [file c5ra26645a1.pdf]

## Supporting Information

### **Formation of tungsten trioxide with hierarchical architectures arranged by tiny nanorods for lithium ion batteries**

*Jiaqin Yang,<sup>a,b</sup> Lirong Xu,<sup>a</sup> Shina Yan,<sup>a</sup> and Wenjun Zheng<sup>\*a,b</sup>*

<sup>a</sup> School of Chemistry and Chemical Engineering, Qufu Normal University, Qufu, Shandong, 273165, China.

<sup>b</sup> Department of Materials Chemistry, TKL of Metal and Molecule-based Material Chemistry, College of Chemistry; Collaborative Innovation Center of Chemical Science and Engineering (Tianjin), Key Laboratory of Advanced Energy Materials Chemistry (Ministry of Education), Nankai University, Tianjin 300071, China.

E-mail: [zhwj@nankai.edu.cn](mailto:zhwj@nankai.edu.cn)

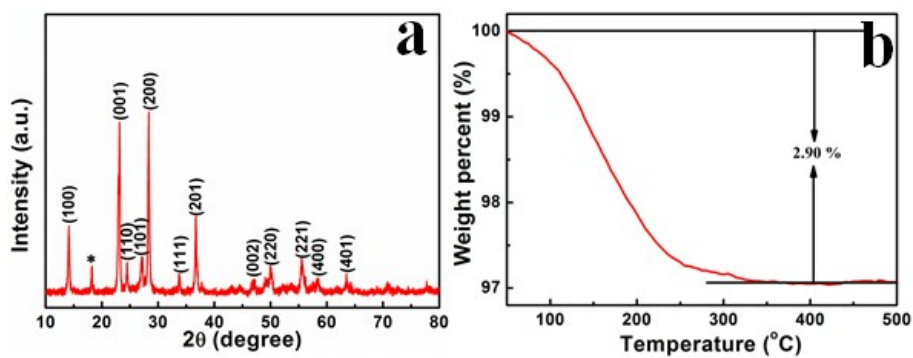

**Fig. S1** (a) XRD pattern and (b) TG curves of the product prepared with 6 mL HCOOH at 180  $^{\circ}\text{C}$  for 12 h.

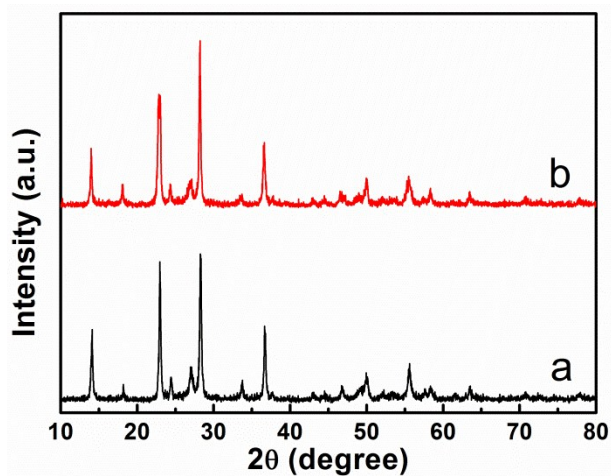

**Fig. S2** XRD pattern of the products prepared with different amount of HCOOH: (a) 4 mL and (b) 12 mL.

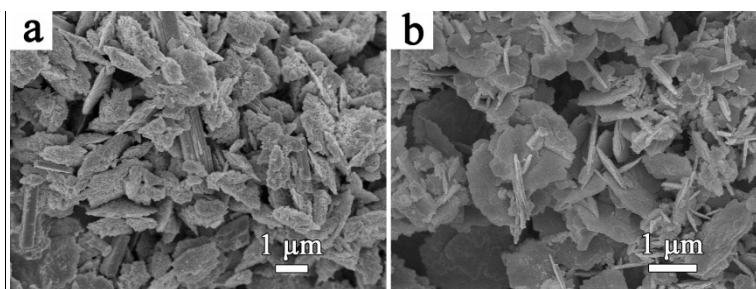

**Fig. S3** SEM images of the products prepared with different amount of HCOOH: (a) 4 mL and (b) 12 mL.

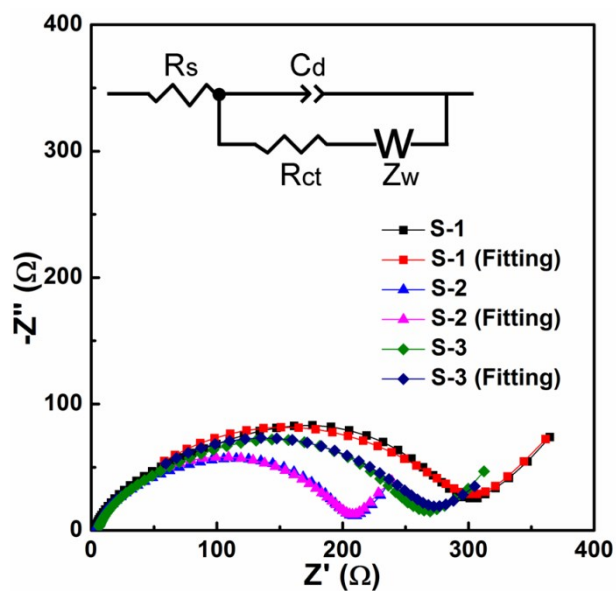

**Fig. S4** The Nyquist plots of the S-1, S-2 and S-3 electrodes, respectively (The inset is the equivalent circuit).
